# Supplementary material for: Distinct Adipogenic and Fibrogenic Differentiation Capacities of Mesenchymal Stromal Cells from Pancreas and White Adipose Tissue
Source: MDPI journal article supplement (doi:10.3390/ijms23042108), 2022-02-14
Supplement: s1 [file s1]

## iwatMSCs

**A**

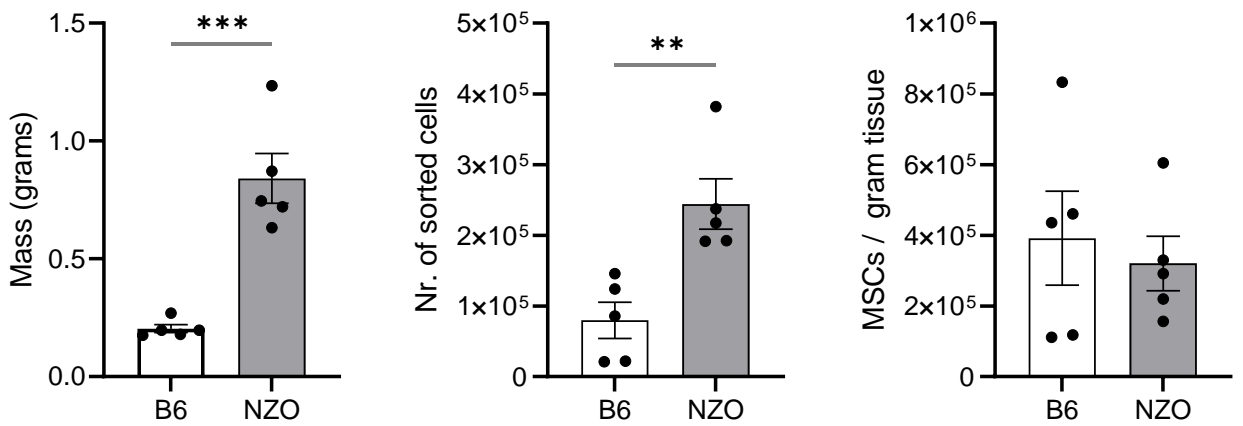

## pMSCs

**B**

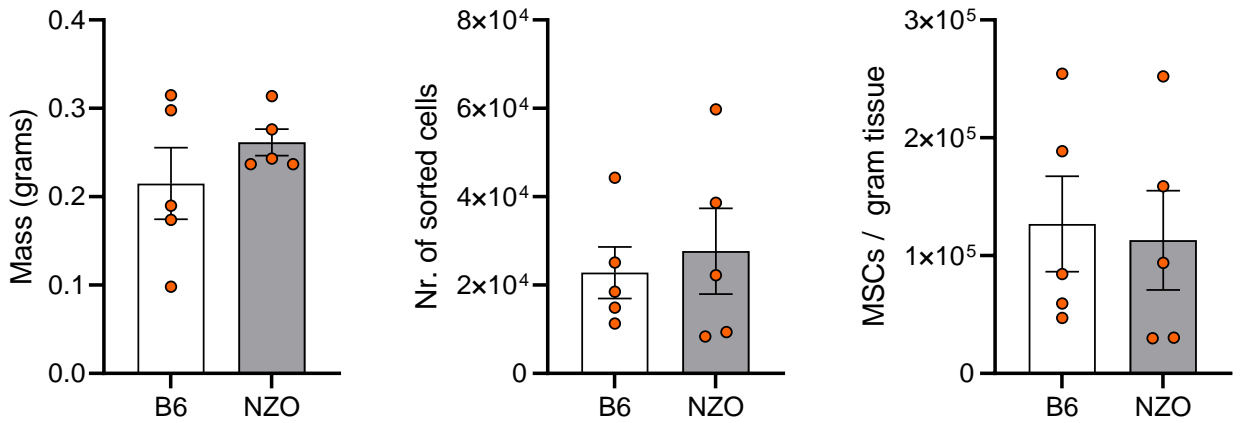

**Supplementary Figure S1. pMSCs and iwatMSCs from B6 and NZO mice do not differ in their relative cell count. (A)** Comparison of B6 and NZO pancreas weight, sorted MSCs and relative MSC count per gram tissue. **(B)** Comparison of B6 and NZO iWAT weight, sorted MSCs and relative MSC count per gram tissue (n=5 per group). Data shown as mean  $\pm$  SEM. Statistical difference was calculated using Student's *t*-test with Welch's correction ( $p < 0.05$ , \*\*\* $p < 0.001$ ).
